# Supplementary material for: Sexual behaviour, STI and HIV testing and testing need among gay, bisexual and other men who have sex with men recruited for online surveys pre/post-COVID-19 restrictions in the UK
Source: PubMed Central journal article supplement (PMC10715464; doi:10.1136/sextrans-2022-055689), 2023-03-01
Supplement: sextrans-2022-055689supp001.pdf [file sextrans-2022-055689supp001.pdf]

**Appendix 1:** Characteristics of GBMSM participating in the 2021 RiiSH-COVID survey by recruitment site

|                                        | <b>2021 All participants (N=1,039) % (n)</b> | <b>2021 participants recruited through social media (N=567) % (n)</b> | <b>2021 participants recruited through Grindr (N=452) % (n)</b> | <b>p-value for differences in samples by recruitment site</b> |
|----------------------------------------|----------------------------------------------|-----------------------------------------------------------------------|-----------------------------------------------------------------|---------------------------------------------------------------|
| <b>Participants' characteristics</b>   |                                              |                                                                       |                                                                 |                                                               |
| <b>Median Age (years) (IQR; range)</b> | 41 (31-51; 17-81)                            | 42 (31-52; 17-81)                                                     | 39 (31-50; 17-77)                                               |                                                               |
| <b>Age category (years)</b>            |                                              |                                                                       |                                                                 |                                                               |
| 16-29                                  | 21.9 (227)                                   | 21.7 (123)                                                            | 22.8 (103)                                                      | 0.024                                                         |
| 30-44                                  | 37.2 (386)                                   | 33.9 (192)                                                            | 40.9 (185)                                                      |                                                               |
| 45 and over                            | 40.9 (425)                                   | 44.4 (251)                                                            | 36.3 (164)                                                      |                                                               |
| <b>Gender identity</b>                 |                                              |                                                                       |                                                                 |                                                               |
| Cis male                               | 95.7 (994)                                   | 96.1 (545)                                                            | 95.1 (430)                                                      | 0.671                                                         |
| Trans male                             | 1.5 (16)                                     | 1.6 (9)                                                               | 1.6 (7)                                                         |                                                               |
| Trans female                           | 0.3 (3)                                      | 0.4 (2)                                                               | 0.2 (1)                                                         |                                                               |
| All other gender identities            | 2.5 (26)                                     | 1.9 (11)                                                              | 3.1 (14)                                                        |                                                               |
| <b>Ethnicity</b>                       |                                              |                                                                       |                                                                 |                                                               |
| White (inc. white minorities)          | 88.1 (915)                                   | 90.5 (513)                                                            | 84.7 (383)                                                      | 0.005                                                         |
| Black                                  | 1.5 (16)                                     | 0.5 (3)                                                               | 2.9 (13)                                                        |                                                               |
| Asian                                  | 5.6 (58)                                     | 4.6 (26)                                                              | 7.1 (32)                                                        |                                                               |
| Mixed and/or other ethnic groups       | 4.8 (50)                                     | 4.4 (25)                                                              | 5.3 (24)                                                        |                                                               |
| <b>Sexual identity</b>                 |                                              |                                                                       |                                                                 |                                                               |
| Gay                                    | 80.9 (841)                                   | 86.2 (489)                                                            | 74.6 (337)                                                      | <0.001                                                        |
| Bisexual                               | 14.0 (145)                                   | 9.9 (56)                                                              | 19.3 (87)                                                       |                                                               |
| Straight                               | 0.6 (6)                                      | 0.7 (4)                                                               | 0.4 (2)                                                         |                                                               |
| All other sexual identities            | 4.5 (47)                                     | 3.2 (18)                                                              | 5.8 (26)                                                        |                                                               |
| <b>Country of residence in the UK</b>  |                                              |                                                                       |                                                                 |                                                               |

|                                                           |            |            |            |        |
|-----------------------------------------------------------|------------|------------|------------|--------|
| England                                                   | 85.6 (889) | 85.7 (486) | 85.2 (385) | 0.098  |
| Scotland                                                  | 7.5 (78)   | 6.9 (39)   | 8.6 (39)   |        |
| Wales                                                     | 4.7 (49)   | 5.8 (33)   | 3.3 (15)   |        |
| Northern Ireland                                          | 2.2 (23)   | 1.6 (9)    | 2.9 (13)   |        |
| <b>Born in the UK</b>                                     |            |            |            |        |
| Yes                                                       | 76.3 (793) | 77.1 (437) | 75.4 (341) | 0.543  |
| <b>Highest educational qualification</b>                  |            |            |            |        |
| Degree or higher                                          | 56.8 (590) | 59.1 (335) | 53.5 (242) | 0.076  |
| <b>Currently employed</b>                                 |            |            |            |        |
| Yes                                                       | 75.7 (786) | 76.7 (435) | 75.0 (339) | 0.523  |
| <b>Living alone</b>                                       |            |            |            |        |
| Yes                                                       | 39.4 (409) | 35.8 (203) | 43.1 (195) | 0.017  |
| <b>Living with partner(s)</b>                             |            |            |            |        |
| Yes                                                       | 33.3 (346) | 38.3 (217) | 26.6 (120) | <0.001 |
| <b>Anxiety level</b>                                      |            |            |            |        |
| High                                                      | 36.1 (372) | 35.7 (202) | 36.3 (162) | 0.835  |
| <b>Life satisfaction level</b>                            |            |            |            |        |
| Low                                                       | 17.3 (179) | 15.7 (89)  | 19.4 (87)  | 0.120  |
| <b>Living with a HIV diagnosis</b>                        |            |            |            |        |
| Yes                                                       | 11.6 (120) | 12.2 (69)  | 10.6 (48)  | 0.441  |
| <b>PrEP use (in the lookback) if HIV-negative/unknown</b> |            |            |            |        |
| Yes                                                       | 31.9 (293) | 29.3 (146) | 34.4 (139) | 0.102  |

Appendix 2: Sexual behaviour reported since restrictions lifted (August- November/December 2020) by GBMSM participating in the 2021 RiiSH-COVID survey

|                                                    | <b>2021 survey (N=1,039)</b> |
|----------------------------------------------------|------------------------------|
| <b>Sexual behaviour (reported in the lookback)</b> |                              |
| <b>No. of new partners (if reporting sex)</b>      | N=946                        |
| None                                               | 22.0 (208)                   |
| One                                                | 14.7 (139)                   |
| 2-4                                                | 28.0 (265)                   |
| 5-9                                                | 16.6 (157)                   |
| 10 or more                                         | 18.7 (177)                   |
| <b>Where participants met new sex partners</b>     |                              |
| Dating applications                                | 77.8 (574)                   |
| Gay websites                                       | 41.1 (303)                   |
| Cruising location                                  | 21.0 (155)                   |
| Private gay sex party                              | 10.7 (79)                    |
| Through friends                                    | 14.5 (107)                   |
| Within household                                   | 11.5 (85)                    |
| Elsewhere                                          | 18.6 (137)                   |
| Through gay organisation or group                  | 7.3 (54)                     |
| <b>No. of CAS partners (if reporting any CAS)</b>  |                              |
| One                                                | 34.6 (238)                   |
| 2-4                                                | 35.2 (242)                   |
| 5-9                                                | 12.2 (84)                    |
| 10+                                                | 18.0 (124)                   |
| <b>Use of chemsex drugs</b>                        |                              |
| Ever                                               | 14.4 (150)                   |
| In the lookback                                    | 5.5 (57)                     |

Appendix 3: Characteristics of cis/trans identifying GBMSM recruited via Grindr for the 2017 and 2021 RiiSH surveys.

|                                 | <b>2021 Grindr sample<br/>(N=437) % (n)</b> | <b>2017 Grindr sample<br/>(N=1902) % (n)</b> | <b>P value (differences<br/>between profiles in<br/>2021 vs 2017)</b> |
|---------------------------------|---------------------------------------------|----------------------------------------------|-----------------------------------------------------------------------|
| <b>Demographics</b>             |                                             |                                              |                                                                       |
|                                 | <b>Median (IQR: range)</b>                  | <b>Median (IQR: range)</b>                   |                                                                       |
| <b>Age (years)</b>              | 40 (31-50; 17-77)                           | 37 (28-48; 16-76)                            |                                                                       |
| 16-29                           | 22.7 (99)                                   | 29.8 (566)                                   | 0.009                                                                 |
| 30-44                           | 40.7 (178)                                  | 37.5 (713)                                   |                                                                       |
| 45-59                           | 29.3 (128)                                  | 29.3 (128)                                   |                                                                       |
| 60+                             | 7.3 (32)                                    | 7.3 (32)                                     |                                                                       |
| <b>Ethnic group</b>             |                                             |                                              |                                                                       |
| White                           | 84.9 (371)                                  | 90.1 (1688)                                  | 0.011                                                                 |
| Black                           | 2.8 (12)                                    | 2.2 (42)                                     |                                                                       |
| Asian                           | 6.9 (30)                                    | 3.8 (72)                                     |                                                                       |
| Mixed or other                  | 5.5 (24)                                    | 3.8 (72)                                     |                                                                       |
| <b>Gender identity</b>          |                                             |                                              |                                                                       |
| Cisgender male                  | 98.4 (430)                                  | 99.4 (1890)                                  | 0.041                                                                 |
| Transgender male                | 1.6 (7)                                     | 0.6 (12)                                     |                                                                       |
| <b>Country of residence</b>     |                                             |                                              |                                                                       |
| England                         | 85.4 (373)                                  | 93.7 (1782)                                  | <0.001                                                                |
| Scotland                        | 8.7 (38)                                    | 0.6 (12)                                     |                                                                       |
| Wales                           | 3.2 (14)                                    | 5.6 (106)                                    |                                                                       |
| Northern Ireland                | 2.8 (12)                                    | 0.1 (2)                                      |                                                                       |
| <b>Educated to degree level</b> | 53.8 (235)                                  | 50.4 (951)                                   | 0.203                                                                 |
| <b>Single</b>                   | 63.8 (279)                                  | 61.9 (1173)                                  | 0.450                                                                 |
| <b>HIV positive</b>             | 10.8 (47)                                   | 11.4 (217)                                   | 0.697                                                                 |
